# Supplementary material
Source: PubMed Central journal article supplement (PMC3780874)
Supplement: 1311660110_pnas.201311660SI.pdf [file 1311660110_pnas.201311660SI.pdf]

# Supporting Information

Hämäläinen et al. 10.1073/pnas.1311660110

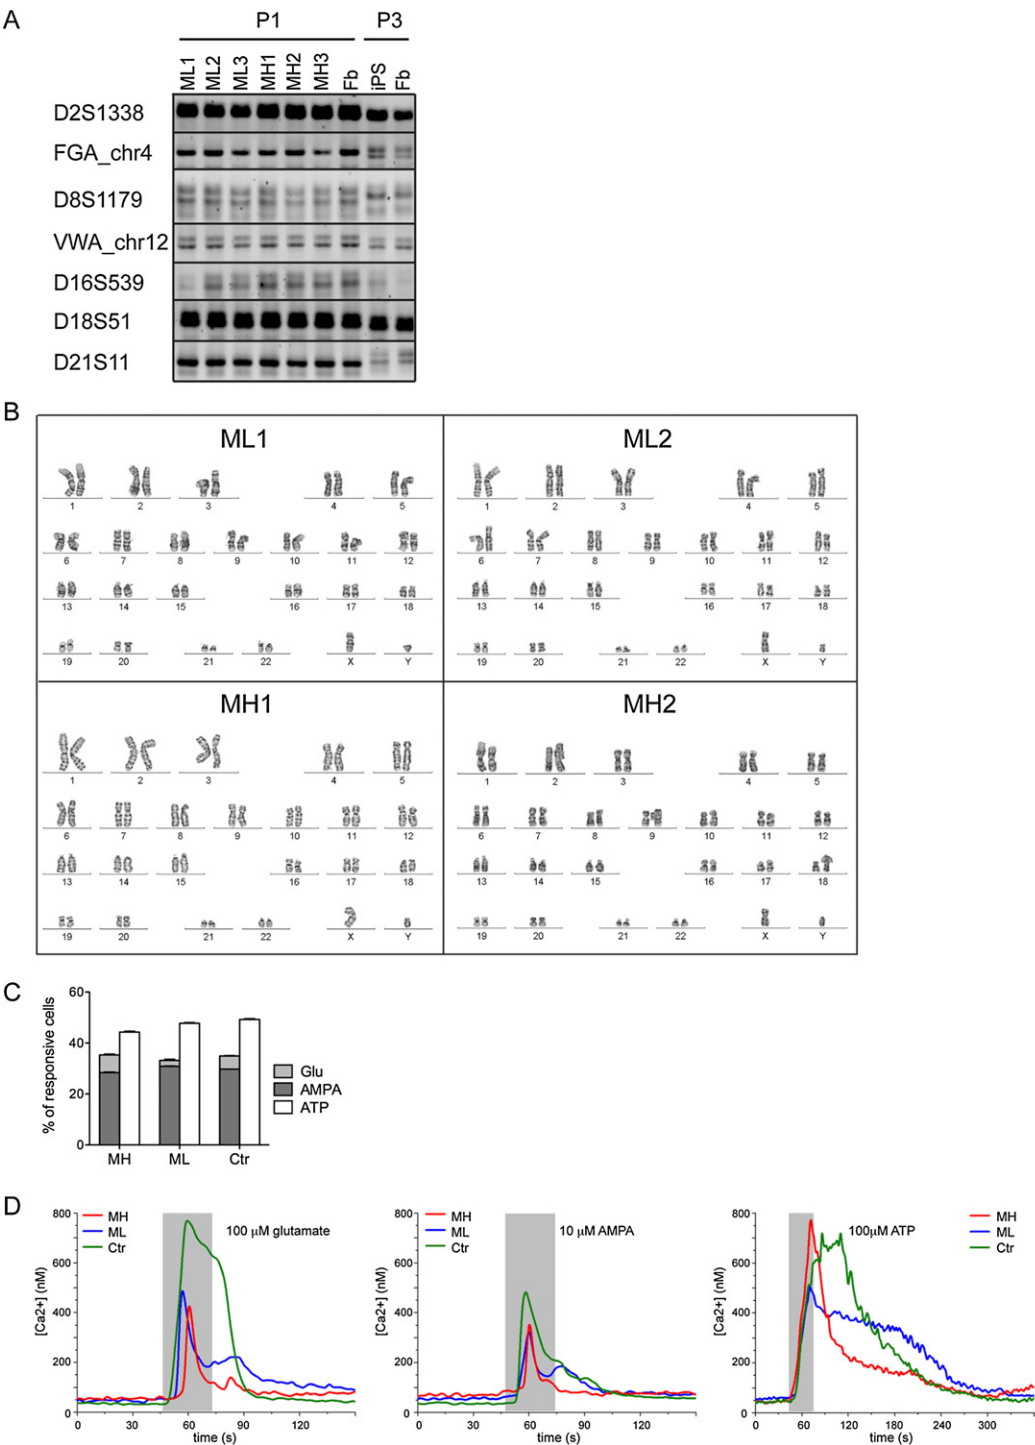

**Fig. S1.** Characterization of mitochondrial encephalomyopathy, lactic acidosis, and stroke-like episodes (MELAS) patient induced pluripotent stem cell (iPSC) lines. (A) Verification of parental identity of iPSC clones. DNA fingerprints of polymorphic DNA-repeat regions of iPSC lines chosen for further analyses. Identical results compared with the parental fibroblasts verify the origin of the studied iPSC lines. P1 and P3, MELAS patients that the original fibroblasts (Fb) were from; MH, MELAS lines with high mtDNA mutant load; ML, MELAS lines with low mtDNA mutant load. (B) Karyotypes of MELAS patient iPSC lines. All four lines analyzed show normal diploid karyotypes. (C) Calcium responses of iPSC-derived neuronal cells. Cytosolic-free Ca<sup>2+</sup> concentration measurements

Legend continued on following page

PNAS

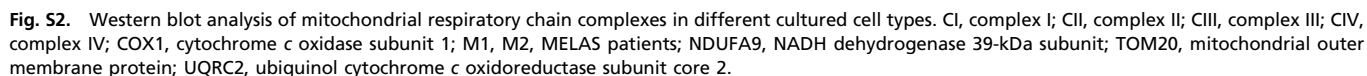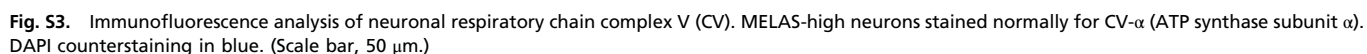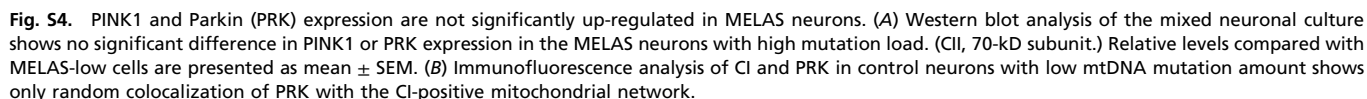

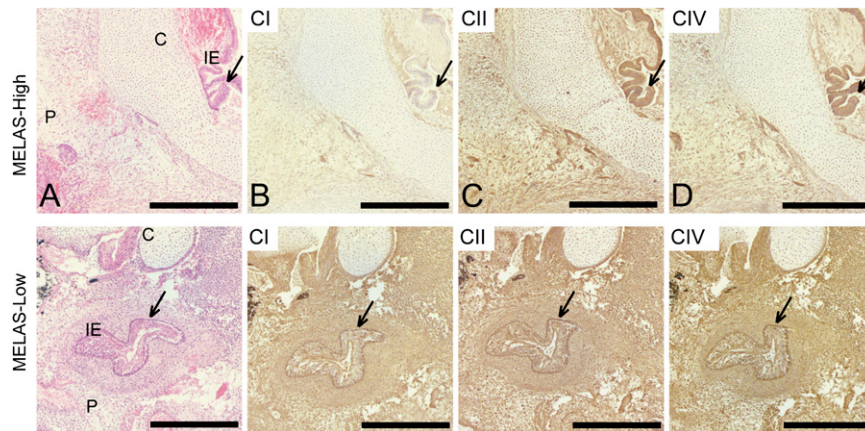

**Fig. S5.** Low respiratory chain CI amount in teratomas with high MELAS mutant amount. (A) Hematoxylin-eosin staining of serial sections of paraffin-embedded, formalin-fixed teratoma tissue with high or low MELAS mutant mtDNA load. C, cartilage; IE, intestinal-like epithelia; P, parenchyma. (B) CI (NDUFS3 antibody) immunohistochemical reactivity in teratomas. Arrow points to an example of a region showing decreased reactivity in teratoma with high MELAS mutant load. (C) CII (70-kDa subunit antibody) immunohistochemical reactivity. (D) CIV (subunit COX1 antibody) immunohistochemical reactivity. (Scale bar, 400  $\mu$ m.)

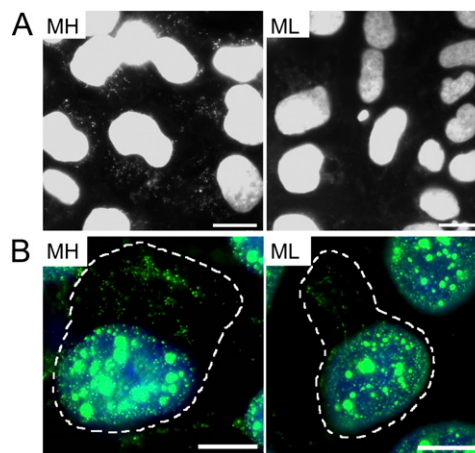

**Fig. S6.** Visualization of mitochondrial nucleoids. (A) Picogreen staining of nucleoids and (B) immunostaining of DNA visualizing nucleus and mitochondrial nucleoids in MELAS iPSCs with high (MH) or low (ML) mutation load. The number of nucleoids is increased in MH cells, with the most prominent increase seen in the largest nucleoids. (Scale bar, 10  $\mu$ m.)
